# Supplementary material for: Conformational control in a bipyridine linked π-conjugated oligomer: cation mediated helix unfolding and refolding
Source: Royal Society of Chemistry journal article supplement (doi:10.1039/c0cc03287e), 2010-01-01
Supplement: c0cc03287e.pdf [file c0cc03287e.pdf]

*Supporting information for*

**Conformational control in a bipyridine linked  $\pi$ -conjugated oligomer: Cation mediated helix defolding and refolding**

Kizhumuri P. Divya,<sup>a</sup> Sivaramapanicker Sreejith,<sup>a</sup> Cherumuttathu H. Suresh<sup>b</sup> and Ayyappanpillai Ajayaghosh<sup>\*a</sup>

\* To whom correspondence should be addressed at:

*Photosciences and Photonics Group,*

*Chemical Sciences and Technology Division,*

*National Institute for Interdisciplinary Science and Technology (NIIST),*

*CSIR, Trivandrum-695019, India*

Tel: +91-471-2515306 Fax: +91-471-2490186, 2491712

Email: [ajayaghosh62@gmail.com](mailto:ajayaghosh62@gmail.com)

## 1. Experimental section

### General

Solvents and reagents were purified and dried by usual methods. All starting materials were obtained from commercial suppliers and used as received. All melting points were determined with Mel-Temp-II melting point apparatus and are uncorrected.  $^1\text{H}$  and  $^{13}\text{C}$  NMR were measured on a 300 MHz Bruker Avance DPX Spectrometer. FT-IR spectrum was obtained on a Nicolet Impact 400D infrared spectrometer. High Resolution Mass Spectra were recorded with a JEOL JMS600. MALDI-TOF mass spectrometry was conducted on a Axima-CFR+ Kratos analytical Shimadzu mass spectrometer using 2,5-dihydrobenzoic acid as the matrix. Electronic absorption spectra were recorded on a Shimadzu UV-3101 PC NIR scanning spectrophotometer and the emission spectra were measured on a SPEX-Fluorolog F112X spectrofluorimeter. CD spectra were recorded on JASCO-J-810 spectropolarimeter equipped with a JASCO PTC-423S Peltier type temperature control system. The gel permeation chromatography was performed on a Waters GPC system with Waters 510 pump and Waters 2487 UV-vis detector, using polystyrene as standards and THF as eluent. The flow rate of THF was maintained as 1 mL/min. All the Photophysical experiments were done with optically transparent solution.

## 2. Synthesis and characterization.

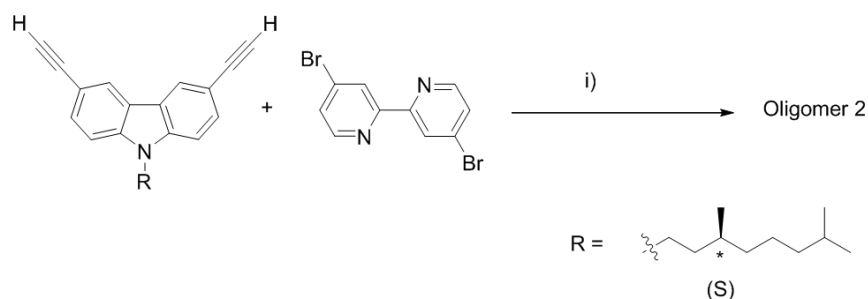

**Scheme 1:** Synthesis of oligomer **2**. Reagents and conditions; i)  $\text{Pd}(\text{PPh}_3)_2\text{Cl}_2$ ,  $\text{CuI}$ ,  $\text{Et}_3\text{N}$ , THF, 64 °C.

### 2a) General procedure for the synthesis of oligomer 2

(S)-9-(3,7-dimethyloctyl)-3,6-diethynyl-9H-carbazole was reacted with one equivalent of the 4,4'-dibromo-2,2'-bipyridine using the standard Sonogashira coupling procedure under reflux condition. After 24 h, the reaction mixture was concentrated and the residue obtained was stirred with methanol for 2 h. The precipitate formed was filtered and redissolved in chloroform. The organic layer was washed with saturated aq. EDTA solution. The product obtained was concentrated by partial removal of the solvent and reprecipitated with methanol followed by repeated precipitation from methanol and hexane. The product thus obtained was filtered through a short alumina column using  $\text{CHCl}_3$ -hexane mixture as the eluent to get the oligomers as brownish yellow solids. The molecular weights were determined by GPC analyses. In order to check the purity, the samples were again reprecipitated from chloroform using methanol followed by repeated washing with methanol and hexane. Repetition of GPC showed no change in the molecular weight. The purity of the oligomers was also confirmed by recording the emission spectra after repeated washing with solvents. In all cases the emission spectra were the same.

**2.** Yield: 62%;  $^1\text{H}$  NMR ( $\text{CDCl}_3$ , 300 MHz):  $\delta$  8.58–8.50 (br, 18H, ArH), 8.39 (br, 18H, ArH), 7.63–7.38 (br, 42H, ArH), 4.35 (br ,

12H, NCH<sub>2</sub>), 1.84 (br, 6H, NCH<sub>2</sub>CH), 1.6 (br, 22H, CH<sub>2</sub>,CH), 1.18 (br, 32H, CH<sub>2</sub>), 0.96 (br, 18H, CHCH<sub>3</sub>), 0.77 (br, 36H, CH(CH<sub>3</sub>)<sub>2</sub>); MALDI-TOF: Calcd for C<sub>226</sub>H<sub>204</sub>Br<sub>2</sub>N<sub>20</sub> (n = 6), 3359.98; found 3361.35 (2852.22 for n = 5 and 2345.98 for n = 4); GPC (Polystyrene, THF): Mn = 3105 g/mol.

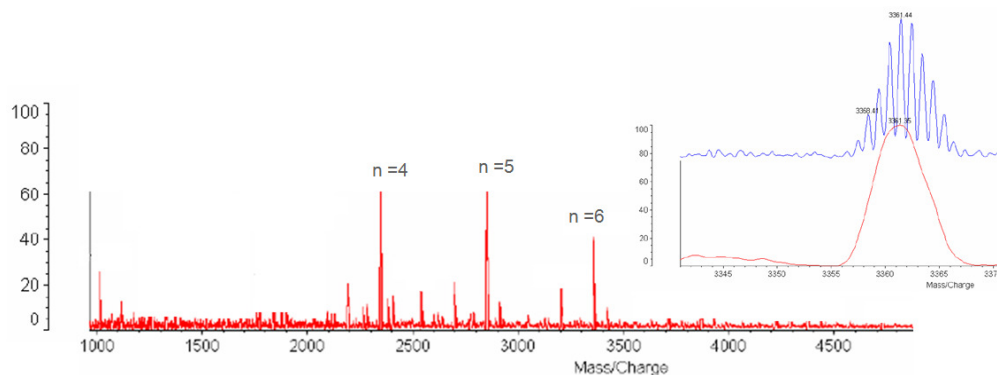

MALDI-TOF mass spectrum of **2**. Isotopic distribution pattern is shown in the inset.

## 2b) Synthesis of model derivative

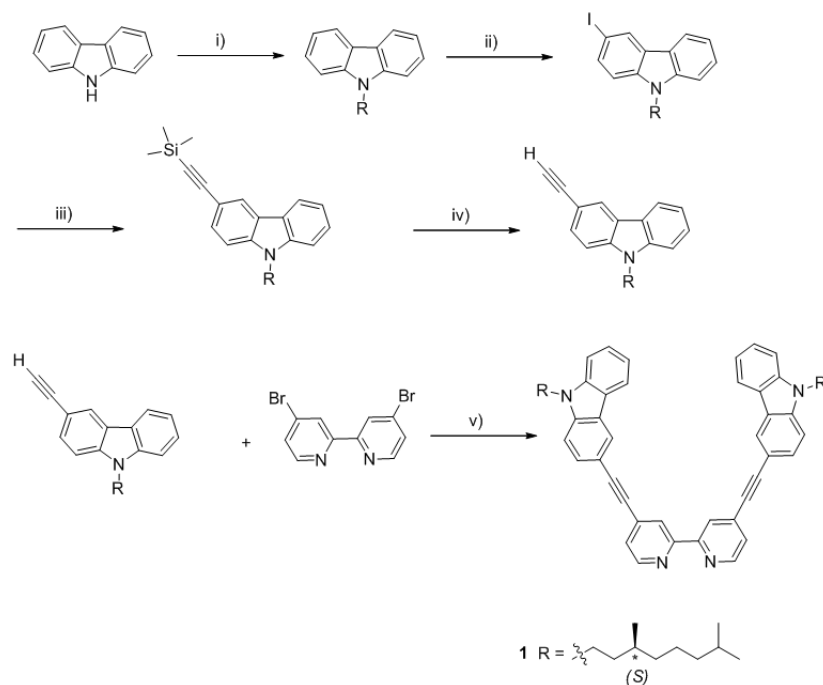

**Scheme 2:** Synthesis of **1**. Reagents and conditions; i) RBr, NaH, THF-DMF, rt, 1 h, ii) NIS, CHCl<sub>3</sub>, AcOH, rt, 16 h, iii) TMS-acetylene, Pd(PPh<sub>3</sub>)<sub>2</sub>Cl<sub>2</sub>, CuI, Et<sub>3</sub>N, THF, rt, iv) KF, THF-MeOH, rt, v) Pd(PPh<sub>3</sub>)<sub>2</sub>Cl<sub>2</sub>, CuI, Et<sub>3</sub>N, THF, 64 °C.

## Synthesis of 1

**i) (S)-9-(3,7-dimethyloctyl)-9H-carbazole:** To a stirred solution of carbazole (6 g, 36 mmol) in a mixture of THF and DMF (3:1 v/v, 40 mL) was added (S)-1-bromo-3,7-dimethyloctane (8 g, 36 mmol) at room temperature. NaH (60% in oil 2.16 g, 54 mmol) was gradually added to the solution and stirred for 1 h. Methanol was added to quench the remaining NaH, and the solvent was evaporated. The residue was extracted with CH<sub>2</sub>Cl<sub>2</sub> and the organic layer was washed with 3N aq. HCl, H<sub>2</sub>O, dried with Na<sub>2</sub>SO<sub>4</sub>. The solvent was evaporated and purified by column chromatography (hexane only) gave an oily liquid. Yield: 97%; <sup>1</sup>H NMR (CDCl<sub>3</sub>, 300MHz): δ 8.09 (d, J = 6 Hz, 2H, ArH), 7.48–7.37 (m, 4H, ArH), 7.23–7.19 (m, 2H, ArH), 4.30 (m, 2H, NCH<sub>2</sub>), 1.5 (m, 4H, NCH<sub>2</sub>CH<sub>2</sub>), 1.21 (m, 6H, CH<sub>2</sub>), 1.15 (m, 3H, CH<sub>2</sub>), 0.85 (t, 6H, CH<sub>3</sub>); <sup>13</sup>C NMR (CDCl<sub>3</sub>, 75 MHz) δ = 140.37, 125.51, 122.77, 120.28, 119.57, 118.63, 109.17, 108.60, 41.26, 39.15, 37.04, 35.49, 30.85, 27.90, 24.58, 22.63, 22.56, 19.70; FAB-MS (m/z): calcd for C<sub>22</sub>H<sub>29</sub>N, 307.23, found 307.57.

**ii) (S)-9-(3,7-dimethyloctyl)-3-iodo-9H-carbazole:** A mixture of (S)-9-(3,7-dimethyloctyl)-9H-carbazole (8 g, 26.05 mmol) and NIS (5.8 g, 26.05 mmol) was stirred in a mixture of CHCl<sub>3</sub> (100 mL) and acetic acid (30 mL) at rt for 16 h. CHCl<sub>3</sub> was evaporated and the solution was poured to water. The resulting precipitate was collected and dissolved in CHCl<sub>3</sub>. The organic layer was washed with saturated Na<sub>2</sub>SO<sub>3</sub>, NaCl, dried with Na<sub>2</sub>SO<sub>4</sub>. White solid was obtained. Yield: 85%; <sup>1</sup>H NMR (CDCl<sub>3</sub>, 300 MHz): δ 8.38 (d, J = 7.8 Hz, 1H, ArH), 8.03 (d, 1H, ArH), 7.71–7.66 (dd, 1H, ArH), 7.50–7.31 (m, 2H, ArH), 7.24–7.13 (m, 2H, Ar), 4.26 (t, J = 7Hz, 2H, NCH<sub>2</sub>), 1.57 (m, 4H, NCH<sub>2</sub>CH<sub>2</sub>), 1.20 (m, 6H, CH<sub>2</sub>), 1.11 (m, 3H, CH<sub>2</sub>), 0.88 (t, 6H, CH<sub>3</sub>); <sup>13</sup>C NMR (CDCl<sub>3</sub>, 75 MHz): δ 133.7, 129.1, 126.2, 121.5, 120.4, 120.3, 119.2, 110.7, 108.8, 81.0, 43.1,

31.8, 29.48, 29.45, 29.2, 28.8, 27.2, 22.6, 14.0; FAB-MS (m/z):  
calcd for C<sub>22</sub>H<sub>28</sub>IN, 433.13, found 433.33.

**iii) (S)-9-(3,7-dimethyloctyl)-3-((trimethylsilyl)ethynyl)-9H-**

**carbazole:** Application of Sonogashira's general procedure for alkyne coupling (S)-9-(3,7-dimethyloctyl)-3-iodo-9H-carbazole (2.5 g, 5.77 mmol), TMS-acetylene (0.57 g, 5.77 mmol), Pd(PPh<sub>3</sub>)<sub>2</sub>Cl<sub>2</sub> (0.201 g, 0.288 mmol), CuI (0.054 g, 0.288 mmol) in triethylamine (5 mL) and THF (30 mL) at room temperature gave the product as yellow oil. Yield: 99%; <sup>1</sup>H NMR (CDCl<sub>3</sub>, 300 MHz): δ 8.23 (s, 1H, ArH), 8.04 (d, J = 6 Hz, 1H, ArH), 7.57-7.54 (dd, 1H, ArH), 7.49-7.34 (m, 2H, ArH), 7.28-7.21 (m, 2H, Ar), 4.27 (t, J = 7 Hz, 2H, NCH<sub>2</sub>), 1.51 (m, 4H, NCH<sub>2</sub>CH<sub>2</sub>), 1.20 (m, 6H, CH<sub>2</sub>), 1.15 (m, 3H, CH<sub>2</sub>), 0.85 (t, 6H, CH<sub>3</sub>), 0.29 (s, 9H, SiCH<sub>3</sub>); <sup>13</sup>C NMR (75 MHz, CDCl<sub>3</sub>): δ 140.59, 140.30, 129.74, 126.02, 124.55, 122.47, 120.35, 119.01, 112.99, 108.59, 106.56, 91.55, 41.23, 39.15, 37.07, 35.46, 30.84, 27.90, 24.57, 22.64, 22.56, 19.69, 0.21; FAB-MS (m/z): calcd for C<sub>27</sub>H<sub>37</sub>NSi, 403.67, found 403.55.

**iv) (S)-9-(3,7-dimethyloctyl)-3-ethynyl-9H-carbazole:** To a solution of (S)-9-(3,7-dimethyloctyl)-3-((trimethylsilyl)ethynyl)-9H-carbazole (1.5 g, 4.95 mmol) in THF was added a solution KF (1 g, 4.95 mmol) in methanol. After stirring at room temperature for 1 h solvent was evaporated and the residue was extracted with CHCl<sub>3</sub>. The organic layer was washed with H<sub>2</sub>O and dried (Na<sub>2</sub>SO<sub>4</sub>). The crude product was purified by column chromatography to give the product as yellow oil. Yield: 96%; <sup>1</sup>H NMR (CDCl<sub>3</sub>, 300 MHz): δ 8.25 (s, 1H, ArH), 8.05 (d, J = 6 Hz, 1H, ArH), 7.6-7.56 (dd, 1H, ArH), 7.49-7.35 (m, 2H, ArH), 7.28-7.20 (m, 2H, Ar), 4.27 (t, J = 7 Hz, 2H, NCH<sub>2</sub>), 3.06 (s, 1H, CH), 1.5 (m, 4H, NCH<sub>2</sub>CH<sub>2</sub>), 1.21 (m, 6H, CH<sub>2</sub>), 1.15 (m, 3H, CH<sub>2</sub>), 0.85 (t, 6H, CH<sub>3</sub>); <sup>13</sup>C NMR (75 MHz, CDCl<sub>3</sub>): δ 140.7, 129.5, 126.1, 124.6, 120.4, 119.3, 111.8, 108.9, 108.6, 85.0, 43.1, 31.8, 29.4, 29.3, 29.2, 28.9,

27.2, 22.6, 14.0; FAB-MS (m/z): calcd for  $C_{24}H_{29}N$ , 331.23, found 332.49.

**v) 4,4'-bis((S)-3,7-dimethyloctyl)-9H-carbazol-3-yl)ethynyl)-2,2'-bipyridine (1):** 4,4'-Dibromo-2,2'-bipyridine (279 mg, 0.88 mmol), was coupled with (S)-9-(3,7-dimethyloctyl)-3-ethynyl-9H-carbazole (582 mg, 1.76 mmol) in presence of  $Pd(PPh_3)_2Cl_2$  (30 mg, 0.044 mmol), CuI (8 mg, 0.044 mmol) in triethylamine (5 mL) and THF (30 mL) by the application of Sonogashira's general procedure for coupling under reflux condition. The crude product obtained was purified by column chromatography in basic alumina using EtOAc/Hexane (2:8). Yield: 67%; mp. 165–166 °C; FT-IR (KBr)  $\nu_{max}$  2920, 2846, 2197, 1626, 1581, 1478, 1231, 1133, 836, 633  $cm^{-1}$ ;  $^1H$  NMR ( $CDCl_3$ , 300 MHz):  $\delta$  8.63 (d, 2H, ArH), 8.5 (s, 2H, ArH), 8.27 (s, 2H, ArH), 8.06–8.03 (d, 2H, ArH), 7.68–7.58 (dd, 2H, ArH), 7.46–7.31 (m, 8H, ArH), 7.23–7.18 (m, 2H, ArH), 4.34 (t,  $J = 7Hz$ , 4H,  $NCH_2$ ), 1.86 (m, 2H,  $CH_2$ ), 1.63 (m, 8H,  $CH_2$ ), 1.23 (m, 2H, CH), 1.12 (m, 8H,  $CH_2$ ), 1.06 (m, 6H,  $CH_2$ ), 1.02–0.83 (m, 12H,  $CH_3$ );  $^{13}C$  NMR (75 MHz,  $CDCl_3$ ):  $\delta$  153.0, 149.18, 140.72, 129.53, 126.29, 125.28, 124.68, 123.13, 120.61, 119.56, 117.05, 114.47, 112.04, 108.89, 104.01, 85.63, 80.02, 53.05, 41.40, 39.19, 37.09, 35.57, 30.92, 29.69, 27.93, 24.61, 22.65, 19.75; FAB-MS (m/z)  $[M+H]^+$ : calcd for  $C_{58}H_{62}N_4$ , 816.14, found 816.45.

### 3 Details of photophysical study

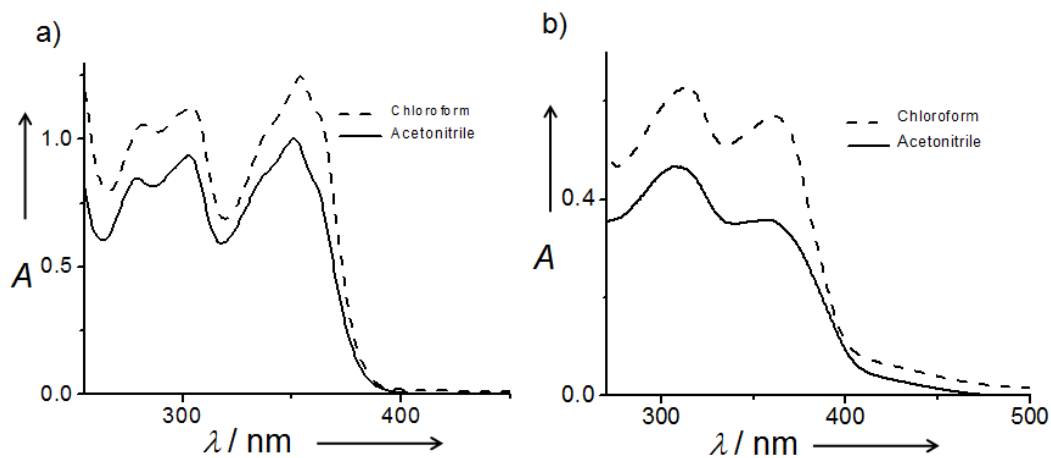

**Figure S1.** Absorption spectra of a) **1** ( $1.6 \times 10^{-5}$  M) and b) **2** ( $3 \times 10^{-6}$  M) chloroform and acetonitrile.

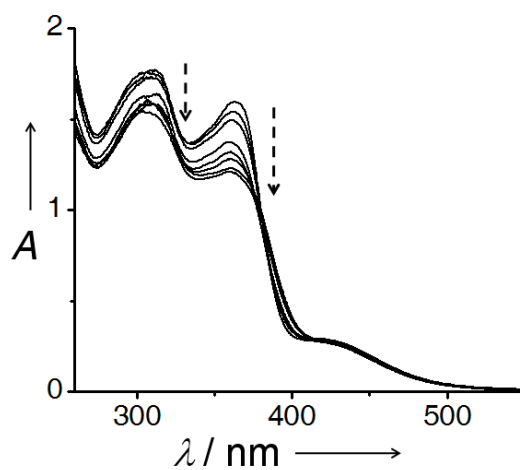

**Figure S2.** Absorption changes of **2** [ $8 \times 10^{-6}$  M] in varying percentages of acetonitrile in chloroform (0-90%, v/v).



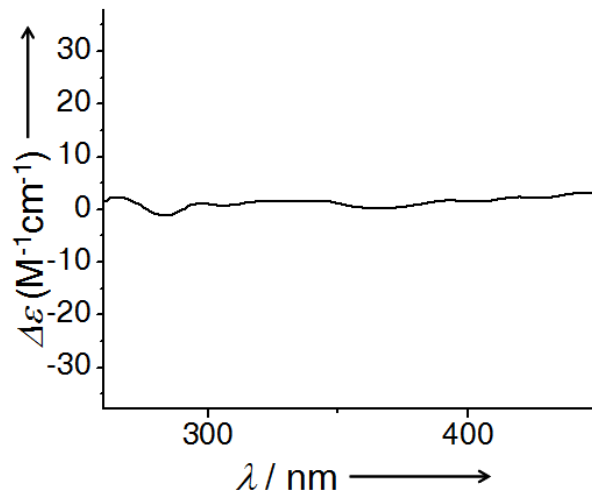

**Figure S3.** a) CD spectrum of **2** in chloroform ( $8 \times 10^{-6}$  M)

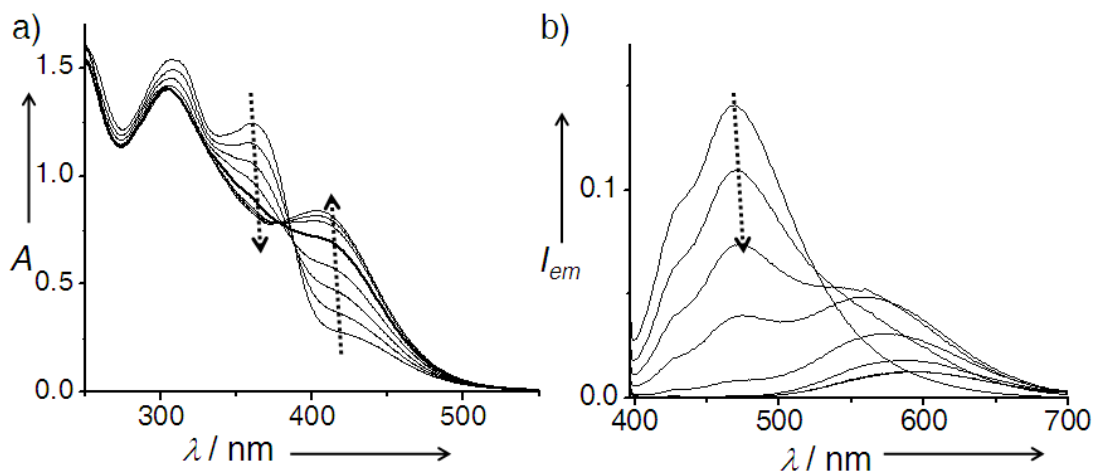

**Figure S4.** a) Changes in the absorption and b) emission spectra of **2** ( $8 \times 10^{-6}$  M) upon addition of  $\text{Zn}^{2+}$  ( $0-2.6 \times 10^{-5}$  M) in 60% acetonitrile/chloroform solution.

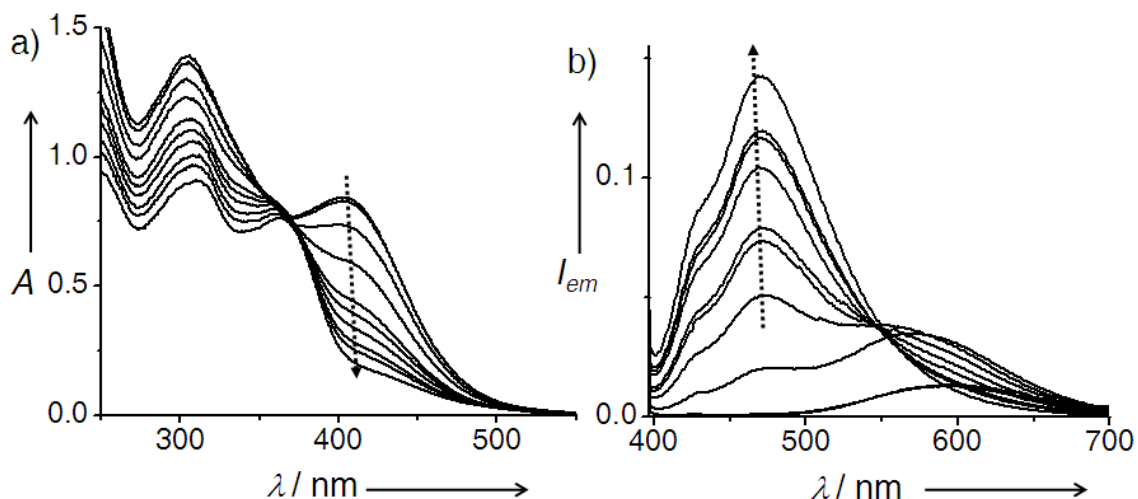

**Figure S5.** a) Changes in the absorption and b) emission spectra of zinc complexed **2** ( $8 \times 10^{-6}$  M) upon addition of EDTA (0– $3.3 \times 10^{-5}$  M) in 60% acetonitrile/chloroform solution.

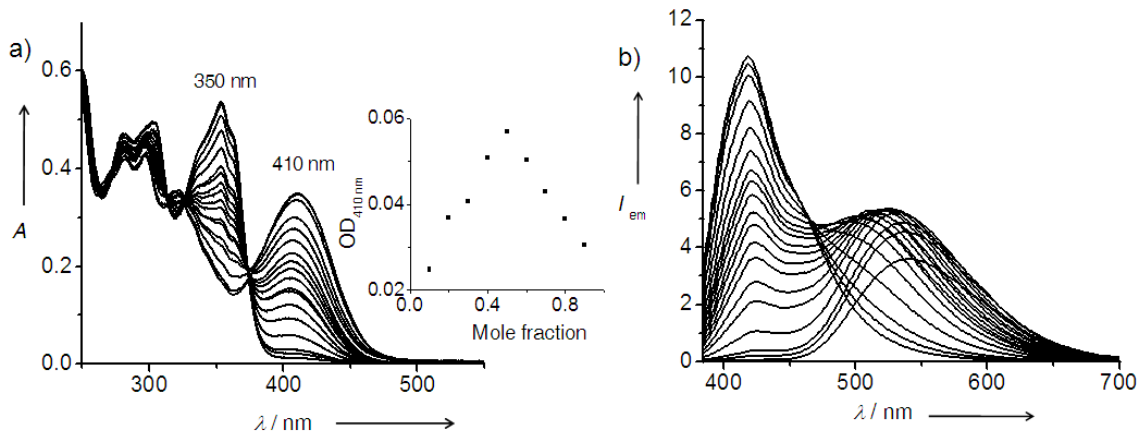

**Figure S6.** a) Changes in the absorption and b) emission spectra of **1** ( $6 \times 10^{-6}$  M) upon addition of  $\text{Zn}^{2+}$  (0– $2.6 \times 10^{-5}$  M) in chloroform solution. (Job's plot for 1:1 binding is shown in inset)

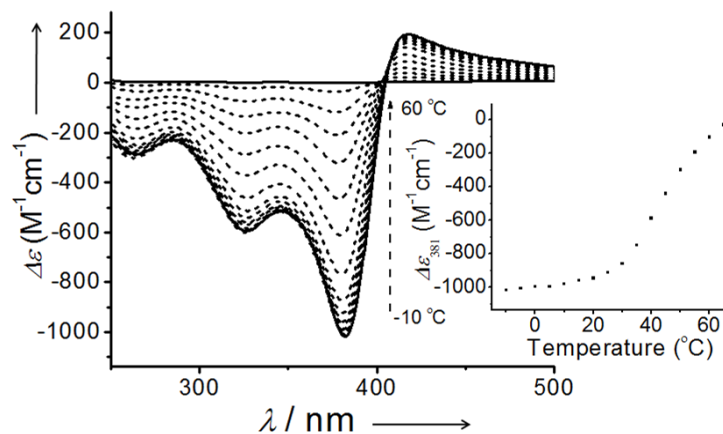

**Figure S7.** Changes in the CD spectrum of **2** ( $8 \times 10^{-6}$  M) with temperature at 60% acetonitrile/chloroform (v/v) solution. Inset shows the changes in CD intensity at 382 nm with temperature

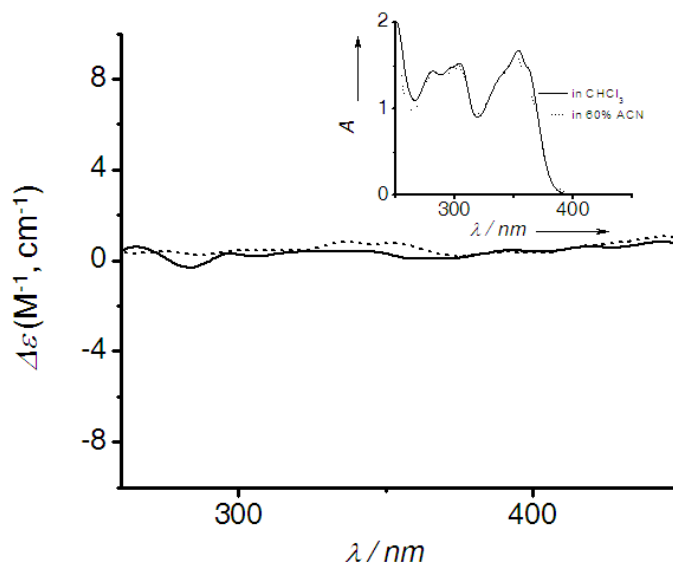

**Figure S8.** CD spectra of **1** ( $2.5 \times 10^{-5}$  M in Chloroform (—) and 60% Acetonitrile (.....). Inset figure shows the corresponding absorption spectra.

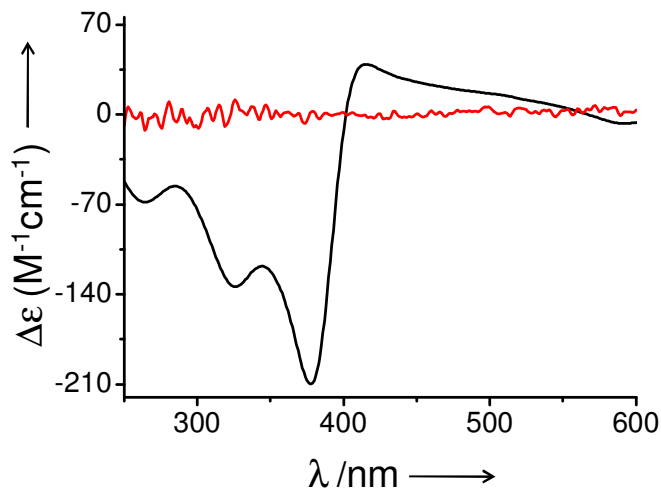

**Figure S9.** CD spectra of **oligomer with 4 repeat units** (—) and **oligomer with 3 repeat units** (—) in 60% Acetonitrile. Oligomer with 4 repeat units is CD active while oligomer with 3 repeat units is CD silent.

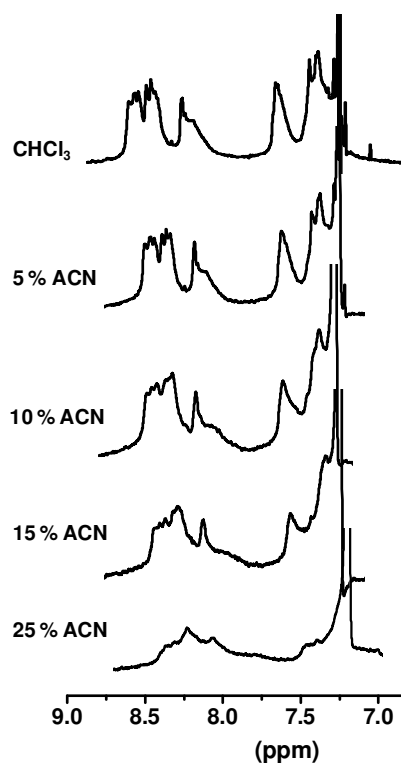

**Figure S10.** Partial  $^1H$  NMR spectral changes (500 MHz at 25 °C) of oligomer **2** in varying percentages of acetonitrile in chloroform (0–25%, v/v)

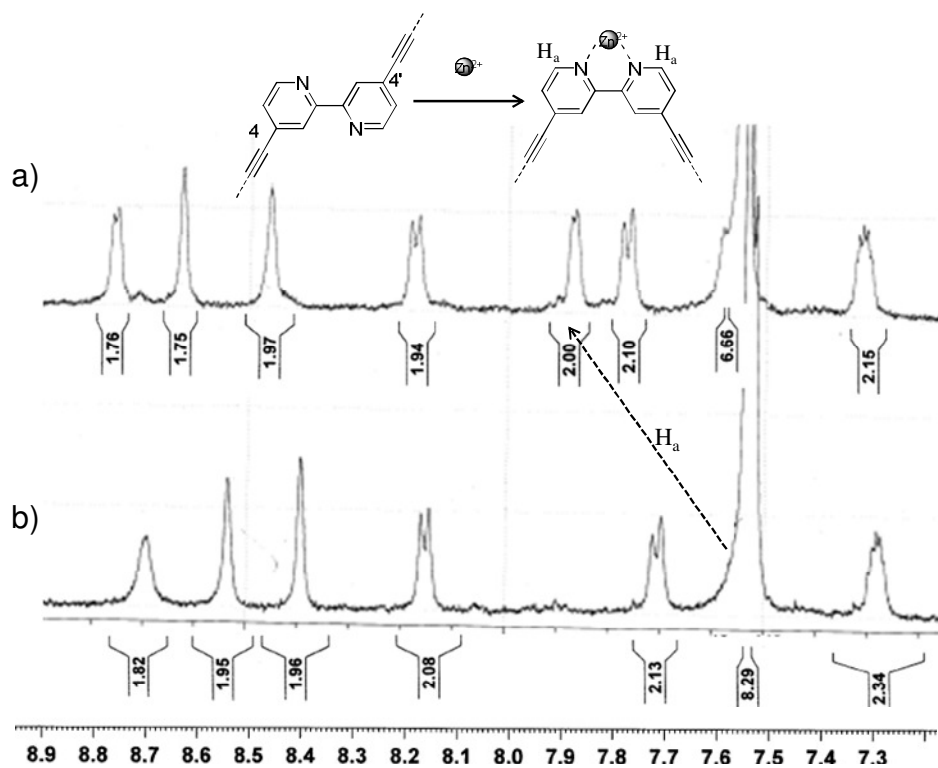

**Figure S11.** Partial  $^1\text{H}$  NMR spectral changes (500 MHz at 25  $^\circ\text{C}$ ) of **1** a) after and a) before complexation with  $\text{Zn}(\text{ClO}_4)_2$  in  $\text{CDCl}_3$ .
